# Supplementary material
Source: PubMed Central journal article supplement (PMC3710748)
Supplement: mmc1.pdf [file mmc1.pdf]

## **Supplemental Data**

### **Mutations in *KLHL40* Are a Frequent Cause of Severe Autosomal-Recessive**

#### **Nemaline Myopathy**

Gianina Ravenscroft, Satoko Miyatake, Vilma-Lotta Lehtokari, Emily J. Todd, Pauliina Vornanen, Kyle S. Yau, Yukiko K. Hayashi, Noriko Miyake, Yoshinori Tsurusaki, Hiroshi Doi, Hiroto Saito, Hitoshi Osaka, Sumimasa Yamashita, Takashi Ohya, Yuko Sakamoto, Eriko Koshimizu, Shintaro Imamura, Michiaki Yamashita, Kazuhiro Ogata, Masaaki Shiina, Robert J. Bryson-Richardson, Raquel Vaz, Ozge Ceyhan, Catherine A. Brownstein, Lindsay C. Swanson, Sophie Monnot, Norma B Romero, Helge Amthor, Nina Kresoje, Padma Sivadorai, Cathy Kiraly-Borri, Goknur Haliloglu, Beril Talim, Diclehan Orhan, Gulsev Kale, Adrian K. Charles, Victoria A. Fabian, Mark R. Davis, Martin Lammens, Caroline A. Sewry, Adnan Manzur, Francesco Muntoni, Nigel F. Clarke, Kathryn N. North, Enrico Bertini, Yoram Nevo, Ekkhard Willichowski, Inger E. Silberg, Haluk Topaloglu, Alan H. Beggs, Richard J.N. Allcock, Ichizo Nishino, Carina Wallgren-Pettersson, Naomichi Matsumoto, and Nigel G. Laing

#### **Supplemental Acknowledgments**

We would like to thank Naruya Saitou at the National Institute of Genetics for helpful comments on computation of the mutational age. The authors acknowledge the facilities and the scientific and technical assistance of the Australian Microscopy & Microanalysis Research Facility at the Centre for Microscopy, Characterisation, and Analysis at The University of Western Australia, a facility funded by the University, State, and Commonwealth Governments. Thanks to Dr. David Margulies and the Boston Children's Hospital Gene Partnership Program for assistance with whole exome sequencing.

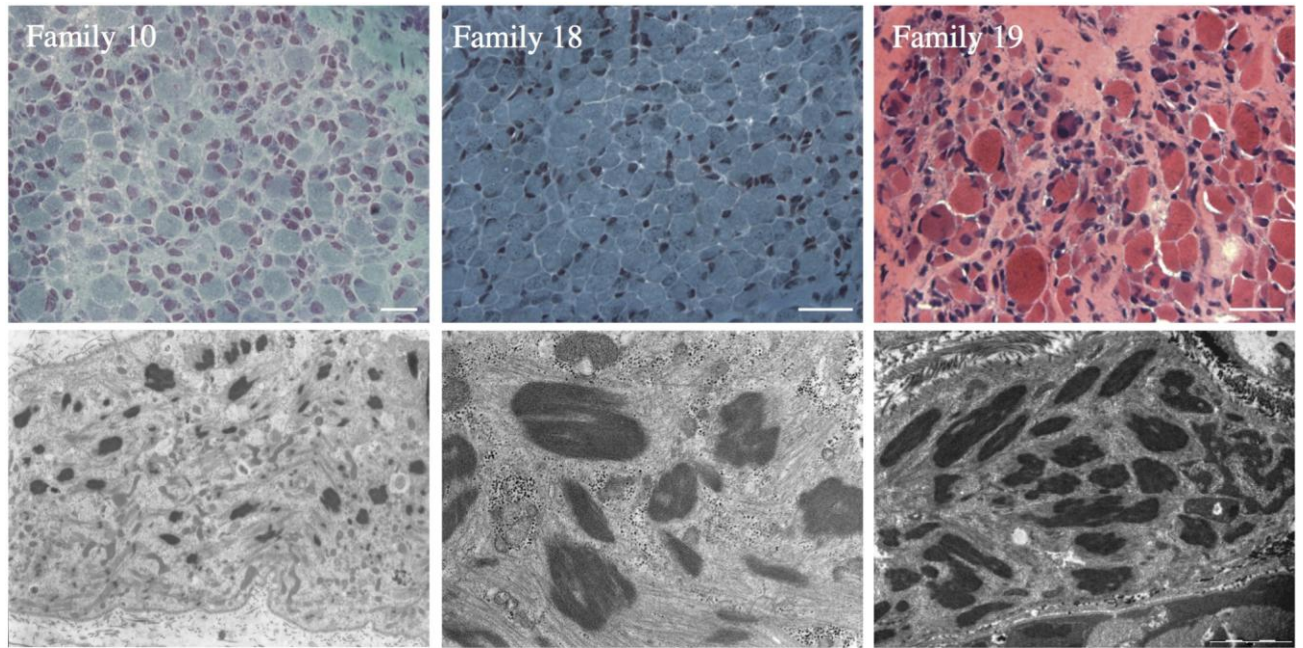

**Figure S1. Muscle Microscopy**

Gomori trichrome (families 10 [II-1] and 18 [II-2]) and H&E staining (family 19) of affected individuals' muscle biopsies showing abnormal variation of myofiber size with many small myofibers, and increased connective tissue, and the presence of numerous red-stained nemaline bodies (in Gomori trichrome staining), sometimes only visible with high power optics (scale bars: 20  $\mu$ m). Electron microscopy showed many nemaline bodies, of varying size and shape, in *KLHL40*-NEM biopsies.

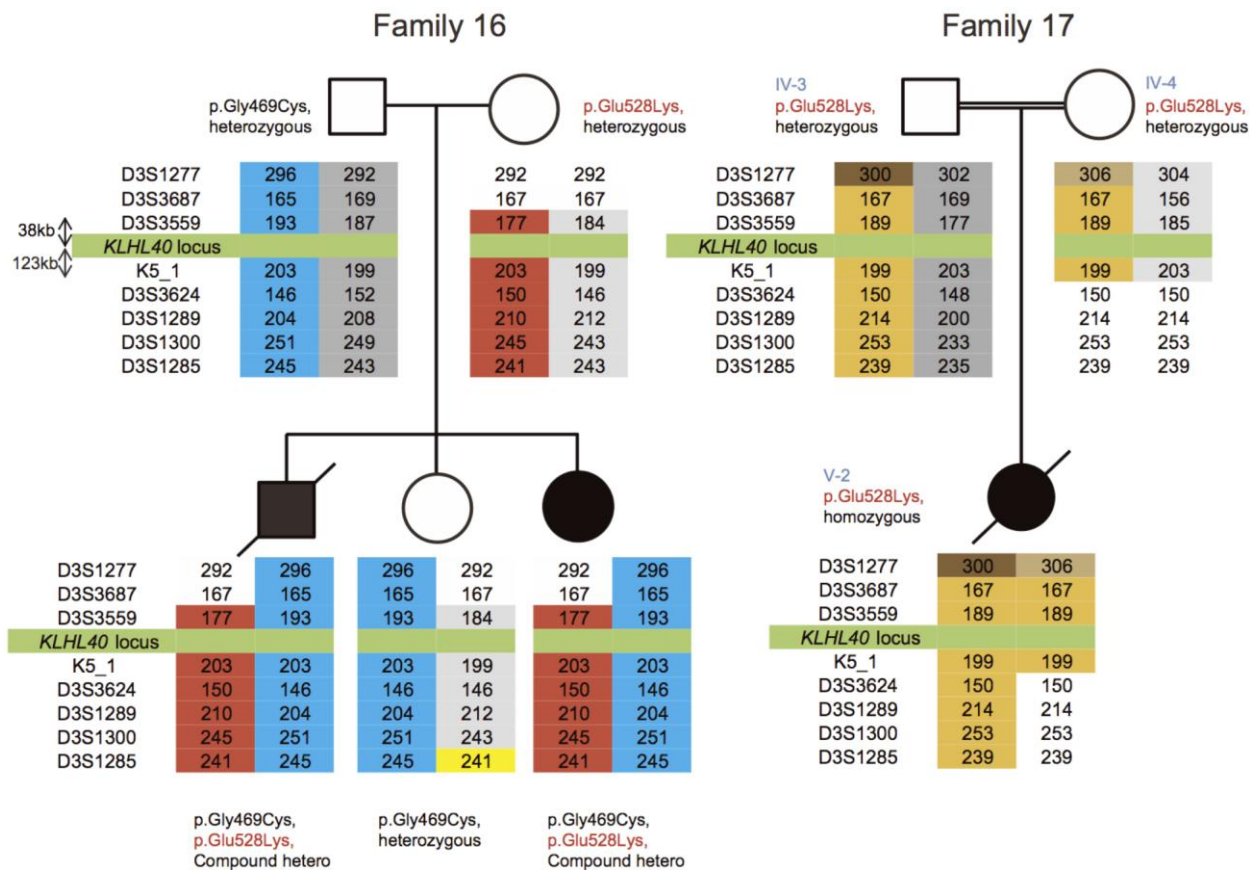

**Figure 2. Haplotype Analysis of Families 16 (Japanese) and 17 (Turkish) around the *KLHL40* Locus**

STR-markers around the *KLHL40* locus (D3S1277, D3S3687, D3S3559, D3S3624, D3S1289, D3S1300, D3S1285, and the in-house (Yokohama) designed TG repeat marker at 42857630-42857822 on Chr3) were used for haplotype analysis. STRs were amplified with fluorescently-labeled primers and fragment analysis was performed by ABI Genetic Analyzer 3500xL and Genemapper v4.1 (Applied Biosystems). K5\_1 represents the originally designed TG repeat marker mapped to 42857630-42857822 on Chr3. D3S3559 is located 38-kb upstream, and K5\_1 is located 123-kb downstream of the *KLHL40* locus. Common haplotypes were not recognized among the c.1582G>A variant carriers from the two pedigrees. Blue highlighted block: Japanese-family specific disease haplotype associated with c.1405G>T, red block: Japanese-family specific disease haplotype associated with c.1582G>A, orange block: Turkish-family specific disease haplotype associated with c.1582G>A, yellow block: suspected recombination, and un-highlighted block: uninformative markers.

KLHL9 [Homo sapiens] -----MKVSLGNGEMVSAHLQPCAG-----TRRF 27  
 KLHL31 [Homo sapiens] MAPKKKIVKRGDINEMETIIVEDSFLKRLNALNGLLEGGNGLSISSEL 50  
 KLHL40 [Homo sapiens] -----NALGLAQEERLQYQTLQDQ----- 22  
 Khl140 [Mus musculus] -----MTLGLAQEERLQYQTLQDQ----- 22  
 Khl140 [Gallus gallus] -----MGLPFDQVEELRLYQTLQDQ----- 22  
 Khl140 [Xenopus laevis] -----MALPTQVEELRLYQTLQDQ----- 22  
 Khl140 [Danio rerio] -----MALPTQVEELRLYQTLQDQ----- 22  
 Gigaxonin [Homo sapiens] -----MAEGSASVDPQHAARLLA----- 19  
 KBTBD13 [Homo sapiens] Patient  
 KLHL9 [Homo sapiens] TSNTHSVVLQGFQDLREGLLCCVTVLPGDGEFFVPHRMAASADVF 77  
 KLHL40 [Homo sapiens] TDASGPHLLSGLSEMRGENFLCGLVIG--TKTSFDFVHRSVMASCSVF 98  
 KLHL40 [Homo sapiens] -----LKMLDHGKFLDCVVR--AGREFFPCHRLVLAACSPFF 58  
 Khl140 [Mus musculus] -----LKMLDHGKFLDCVVR--VGEREFFPCHRLVLAACSPFF 58  
 Khl140 [Gallus gallus] -----LKMLDHGKFLDCVLR--VGRKFFPCHRLVLAACSPFF 58  
 Khl140 [Xenopus laevis] -----LKMLDHGKFLDCVLR--VGRKFFPCHRLVLAACSPFF 58  
 Khl140 [Danio rerio] -----GLLDANKFVCLIK--IKDEFFPCHRLVLAACSPFF 34  
 Gigaxonin [Homo sapiens] -----LSSFREESRFDALHV--LDGEEIPVQKRLAASAPYI 55  
 KBTBD13 [Homo sapiens] -----MARGPQTLVQVVG--GGLFQADRALLVHEGQF 32  
 Patient  
 KLHL9 [Homo sapiens] KAMFTGM--EQDLMCIKLHGKVNKGLKIIIDFYIAKLSLN-MDLQD 124  
 KLHL31 [Homo sapiens] YNLIK-----KDPISIQVDLNDISPLGLATVIAYATYTKRLTIS--LYTIG 142  
 KLHL40 [Homo sapiens] RANFLAEP--ERAQ--ELHLEEVSPDVAQVLIHYITSEIALD--EASVD 103  
 Khl140 [Mus musculus] -----RANFLAEP--DSAG--EVRLEEVSPDVAQVLIHYITSEIALD--EASVD 103  
 Khl140 [Gallus gallus] RANFLSDM--EESKREVSLEDDVDMGKLIHYITSEIEIT--EQVQD 105  
 Khl140 [Xenopus laevis] RANFLSDL--EESKREILEDVDDVDMGKLIHYITSEIEIT--EKVQD 105  
 Khl140 [Danio rerio] RANFLSDL--EESKREILEDVDDVDMGKLIHYITSEIEIT--EKVQD 81  
 Khl140 [Xenopus laevis] RKLAYVFPKDGSSFKYELGELISVWQKGLLDYFISQIRLA--EDYIQ 104  
 KBTBD13 [Homo sapiens] RGLFRSMG--ETRAAEVRLGLVLSAGFRATLQVLRGDRPALAAEDQLQ 60  
 Patient  
 KLHL9 [Homo sapiens] TLEASFLQILPVLDFQKVFVLSIGVSDNLCVVEGRIANTYNIIVFDVYVN 174  
 KLHL31 [Homo sapiens] IISAAVYLQIHTLVMSDFLIREMSVENCYVNIATYTSKKNAAAQ 192  
 KLHL40 [Homo sapiens] LFAAAHFRQIPSIPTFCVSLQRLCLSNCLAVFRLLGLLDCARLVAAR 153  
 Khl140 [Mus musculus] LFAAAHFRQIPSIPTFCVSLQRLCLSNCLAVFRLLGLLDCARLVAAR 153  
 Khl140 [Gallus gallus] LFSVANMFOIPSIPTFCVSLQRLCLSNCLAVFRLLGLLDCARLVAAR 155  
 Khl140 [Xenopus laevis] LFSVANMFOIPSIPTFCVSLQRLCLSNCLAVFRLLGLLDCARLVAAR 155  
 Khl140 [Danio rerio] IFMANMYQIPSIPTFCVSLQRLCLSNCLAVFRLLGLLDCARLVAAR 131  
 Gigaxonin [Homo sapiens] VVQADLTLTLKTLCCFLEGCIAEACIGIRDFALHLLVHVVYLAT 154  
 KBTBD13 [Homo sapiens] AVECAALFQAFALAR----FLEHNLTSQWALCLDAAAAGFLRDFVHSA 126  
 Patient  
 KLHL9 [Homo sapiens] NPIKKNFPALLSTGEFLKLPFERLAFVLSNSLKIETLPEKACRWR 244  
 KLHL31 [Homo sapiens] KFIIDNLEFASDQFMRKLTPEQINELLIDDDQLPSEIEVAQIAMKLE 242  
 KLHL40 [Homo sapiens] DFICARFLVARADPGLSADLELAIISDGLNVEKEAVFAVMHAG 203  
 Khl140 [Mus musculus] DFICARFLVARADPGLSADLELAIISDGLNVEKEAVFAVMHAG 203  
 Khl140 [Gallus gallus] DFICDRFALVSRDEEYFGLSADLELAIISDGLNVEKEAVFAVMHAG 204  
 Khl140 [Xenopus laevis] DFVCDRFLVSRDEEYFGLSADLELAIISDGLNVEKEAVFAVMHAG 204  
 Khl140 [Danio rerio] DFICDRVLLIIRDQDFHQLGSPSALAAITCSBLSNVEKEAVFAVMHAG 176  
 Gigaxonin [Homo sapiens] EYLTFRFVSTTEFLSQRLEKLVISLEKLNQSERVFAVWIA 204  
 KBTBD13 [Homo sapiens] LFVCDRERLAEALPEAR-----AYVALRFS 156  
 Patient  
 KLHL9 [Homo sapiens] LEDPRM-----DYAKLMLKIRPFLMTPQLLNYVQVDDTDTMTCVNL 269  
 KLHL31 [Homo sapiens] FQKRV-----KYAADLNSIRFGTISADQLVNYVQVDDTDTMTCVNL 269  
 KLHL40 [Homo sapiens] SDAEAQERQALPTVFESVRCRLPRAFLERVRERPLVRAQPELLAK 253  
 Khl140 [Mus musculus] SDAEAQERQALPTVFESVRCRLPRAFLERVRERPLVRAQPELLAK 253  
 Khl140 [Gallus gallus] TKDQES--RQALPVFESIRFLMPKDIKHVVEKQAVSSPELLK 252  
 Khl140 [Xenopus laevis] SREKES--RTALPVFESIRFLMPKDIKHVVEKQAVSSPELLK 251  
 Khl140 [Danio rerio] YDTER-----FKELPELHCVRFLMPTSFYKKEVEGRILRINTQEKKE 227  
 Khl140 [Xenopus laevis] HDTET-----KVHMDVMSALVSGLDSSYFKRQMLNEPLVREIKVCSN 250  
 Gigaxonin [Homo sapiens] HDTET-----YAAVSTHTPAPGFLDASRCTLVLEDEEDAWT 189  
 KBTBD13 [Homo sapiens] Patient  
 KLHL9 [Homo sapiens] LLEASNQMPYMQPQNSD----- 289  
 KLHL31 [Homo sapiens] LVDANNYHLLPQHTLQSR----- 301  
 KLHL40 [Homo sapiens] VQVMDAHEGRITLTKKKK--GKDGAKAEADKQTSKAKAEDEDEAEKI 307  
 Khl140 [Mus musculus] VQVMDAHEGRITLTKKKK--GKDGAKAEADKQTSKAKAEDEDEAEKI 307  
 Khl140 [Gallus gallus] LQVMDAQQKQFVTKKKK--KKDEQAKQAVNVNAGDEDEDEDE 299  
 Khl140 [Xenopus laevis] LQVMDAQQKQFVTKKKK--KKDEQAKQAVNVNAGDEDEDEDE 299  
 Khl140 [Danio rerio] LQVMDAQQKQFVTKKKK--KKDEQAKQAVNVNAGDEDEDEDE 276  
 Gigaxonin [Homo sapiens] IFLSQPQQGAEALANFRFG----- 270  
 KBTBD13 [Homo sapiens] LAALP----- 194  
 Patient  
 KLHL9 [Homo sapiens] RTAIRSDSTHLVTLGGVLRQQLVSVKELMYDERAQEWSLAMPDAPRY 339  
 KLHL31 [Homo sapiens] RTRIRGGCVLTVGGPGLTELSRDLIYKDPENSGKLTWEPASFN 357  
 KLHL40 [Homo sapiens] LPLGLNDRFQMGFLQDLFMISEGAAYVDPANECYASLSQIPKNI 351  
 Khl140 [Mus musculus] LPLGLNDRFQMGFLQDLFMISEGAAYVDPANECYASLSQIPKNI 351  
 Khl140 [Gallus gallus] LPLGLNDRFQMGFLQDLFMISEGAAYVDPANECYASLSQIPKNI 349  
 Khl140 [Xenopus laevis] LPLGLNDRFQMGFLQDLFMISEGAAYVDPANECYASLSQIPKNI 349  
 Khl140 [Danio rerio] LPLGLNDRFQMGFLQDLFMISEGAAYVDPANECYASLSQIPKNI 316  
 Gigaxonin [Homo sapiens] YSECIVTVGGEERVSRKPTAAMR--CMCLYDPPNQLMELAPMSRIN 318  
 KBTBD13 [Homo sapiens] -----LEASTLL 201  
 Patient  
 KLHL9 [Homo sapiens] HGIAVIGNFLVYVGGSSNYDK--GKTVADTVFRDPRYKRWQVALENE 387  
 KLHL31 [Homo sapiens] QCVAVMGDFLYVAGDEQDNDARQAKRVAISVFCVDPDFRFTWHLA--SNQ 407  
 KLHL40 [Homo sapiens] VSLVTKENQVFAAG--LFTYEDNEDKEDPMSAYFLQDHLDSWELGMPFLS 400  
 Khl140 [Mus musculus] VSLVTKENQVFAAG--LFTYEDNEDKEDPMSAYFLQDHLDSWELGMPFLS 400  
 Khl140 [Gallus gallus] VSLVTKENQVFAAG--LFTYEDNEDKEDPMSAYFLQDHLDSWELGMPFLS 398  
 Khl140 [Xenopus laevis] VSLVTKENQVFAAG--LFTYEDNEDKEDPMSAYFLQDHLDSWELGMPFLS 393  
 Khl140 [Danio rerio] VSLVTKENQVFAAG--LFTYEDNEDKEDPMSAYFLQDHLDSWELGMPFLS 365  
 Gigaxonin [Homo sapiens] HGVLSAEGFLVFAAG--QDENKQVLSGKEDYDPAWTVLAPMNE 362  
 KBTBD13 [Homo sapiens] ACVATLGNKLYLVGG--VGRASREVEGLVGYCDPQDGTWHPFSPHQ 246  
 Patient  
 KLHL9 [Homo sapiens] KRTPHLSALKGHLYAVGGR--SAGELATVECVYRPMNEWSYVAMSE 434  
 KLHL31 [Homo sapiens] KRTPHLSVFNGLYVAGGR--SAGELATVECVYRPMNEWSYVAMSE 434  
 KLHL40 [Homo sapiens] KRTPHLSVFNGLYVAGGR--SAGELATVECVYRPMNEWSYVAMSE 434  
 Khl140 [Mus musculus] KRTPHLSVFNGLYVAGGR--SAGELATVECVYRPMNEWSYVAMSE 434  
 Khl140 [Gallus gallus] KRTPHLSVFNGLYVAGGR--SAGELATVECVYRPMNEWSYVAMSE 434  
 Khl140 [Xenopus laevis] KRTPHLSVFNGLYVAGGR--SAGELATVECVYRPMNEWSYVAMSE 434  
 Khl140 [Danio rerio] KRTPHLSVFNGLYVAGGR--SAGELATVECVYRPMNEWSYVAMSE 434  
 Gigaxonin [Homo sapiens] KRTPHLSVFNGLYVAGGR--SAGELATVECVYRPMNEWSYVAMSE 434  
 KBTBD13 [Homo sapiens] KRTPHLSVFNGLYVAGGR--SAGELATVECVYRPMNEWSYVAMSE 434  
 Patient  
 KLHL9 [Homo sapiens] PHYHAGTVYGLMAYISGCIITD--TQNELMCFDPTDTRMQRAPMTVR 483  
 KLHL31 [Homo sapiens] ARCSHIAVADGRVTVYGCYLAN--AFSRVCAIDPAGDSQELPLRFTFR 503  
 KLHL40 [Homo sapiens] VYGLTVSHMDLVYVIGKGLSKDRKCLMKNVDFPKKFKKELAPMGTAR 500  
 Khl140 [Mus musculus] VYGLTVSHMDLVYVIGKGLSKDRKCLMKNVDFPKKFKKELAPMGTAR 500  
 Khl140 [Gallus gallus] VYGLTVSHMDLVYVIGKGLSKDRKCLMKNVDFPKKFKKELAPMGTAR 498  
 Khl140 [Xenopus laevis] VYGLTVSHMDLVYVIGKGLSKDRKCLMKNVDFPKKFKKELAPMGTAR 493  
 Khl140 [Danio rerio] VYGLTVSHMDLVYVIGKGLSKDRKCLMKNVDFPKKFKKELAPMGTAR 465  
 Gigaxonin [Homo sapiens] VRKICCTAAMKLYYVIGKGLSKDRKCLMKNVDFPKKFKKELAPMGTAR 458  
 KBTBD13 [Homo sapiens] PAAGVCAQACGRFLVCLRPAD---TAVAVEVARTMDLVAELRRPQ 340  
 Patient  
 KLHL9 [Homo sapiens] GL--HMCVTGDKLVYVGNHR--GTSYDVLVLSCEYVSLPTQDPTIA 530  
 KLHL31 [Homo sapiens] GW--HCAVTLSDRVVVMAGQGLG--PRGVRVDMVLEKSLPAA 550  
 KLHL40 [Homo sapiens] SL--FGAVHVDRIYVAG-----VTDGLTSSAVSITDRNKA 542  
 Khl140 [Mus musculus] SL--FGAVHVDRIYVAG-----VTDGLTSSAVSITDRNKA 542  
 Khl140 [Gallus gallus] SL--FGAVHVDRIYVAG-----VTDGLTSSAVSITDRNKA 542  
 Khl140 [Xenopus laevis] SL--FGAVHVDRIYVAG-----VTDGLTSSAVSITDRNKA 542  
 Khl140 [Danio rerio] SL--FGAVHVDRIYVAG-----VTDGLTSSAVSITDRNKA 542  
 Gigaxonin [Homo sapiens] SL--FGAVHVDRIYVAG-----VTDGLTSSAVSITDRNKA 542  
 KBTBD13 [Homo sapiens] SL--FGAVHVDRIYVAG-----VTDGLTSSAVSITDRNKA 542  
 Patient  
 KLHL9 [Homo sapiens] MLRGSD-----VGVAFENKIYVGGSSWNNMNCVIVKQVDFEKDEWH 575  
 KLHL31 [Homo sapiens] LQGVST-----AGVBAIGHNATLVGWEKYYKICQCFSELEWET 595  
 KLHL40 [Homo sapiens] FQERSS-----LVLVSLVGLYVAGGATLETSEGE--LVPTEMDIN 584  
 Khl140 [Mus musculus] FQERSS-----LVLVSLVGLYVAGGATLETSEGE--LVPTEMDIN 584  
 Khl140 [Gallus gallus] FQERSS-----LVLVSLVGLYVAGGATLETSEGE--LVPTEMDIN 582  
 Khl140 [Xenopus laevis] FQERSS-----LVLVSLVGLYVAGGATLETSEGE--LVPTEMDIN 577  
 Khl140 [Danio rerio] FQERSS-----LVLVSLVGLYVAGGATLETSEGE--LVPTEMDIN 550  
 Gigaxonin [Homo sapiens] QNLCPASSVYGVAVPAGSIVYVIGDGLTDTYDVR--EPRSTGTH 555  
 KBTBD13 [Homo sapiens] QPNVSKG--ALFTAVVGGTVTVNRMFTLLVIAEGQTVRLREKAGFP 431  
 Patient  
 KLHL9 [Homo sapiens] KVDFLPEALGGTRACTLVFPPEENPSPGSRSEPLSAPSHS 617  
 KLHL31 [Homo sapiens] EDDEFLPEALGGTRACTLVFPPEENPSPGSRSEPLSAPSHS 617  
 KLHL40 [Homo sapiens] RYNEEERKVEGLREIYAAAGATFLVRLVRLVLTGM----- 621  
 Khl140 [Mus musculus] RYNEEERKVEGLREIYAAAGATFLVRLVRLVLTGM----- 621  
 Khl140 [Gallus gallus] RYNEEERKVEGLREIYAAAGATFLVRLVRLVLTGM----- 619  
 Khl140 [Xenopus laevis] RYNEEERKVEGLREIYAAAGATFLVRLVRLVLTGM----- 614  
 Khl140 [Danio rerio] RYNEEERKVEGLREIYAAAGATFLVRLVRLVLTGM----- 587  
 Gigaxonin [Homo sapiens] RYNEEERKVEGLREIYAAAGATFLVRLVRLVLTGM----- 597  
 KBTBD13 [Homo sapiens] RYNEEERKVEGLREIYAAAGATFLVRLVRLVLTGM----- 458  
 Patient

**Figure 3. Clustal Alignment of Human BTB-Kelch Proteins and KLHL40 Sequences for Different Species**

Residues that harbor missense substitutions are highlighted in red and the mutated amino acids shown below the alignments.





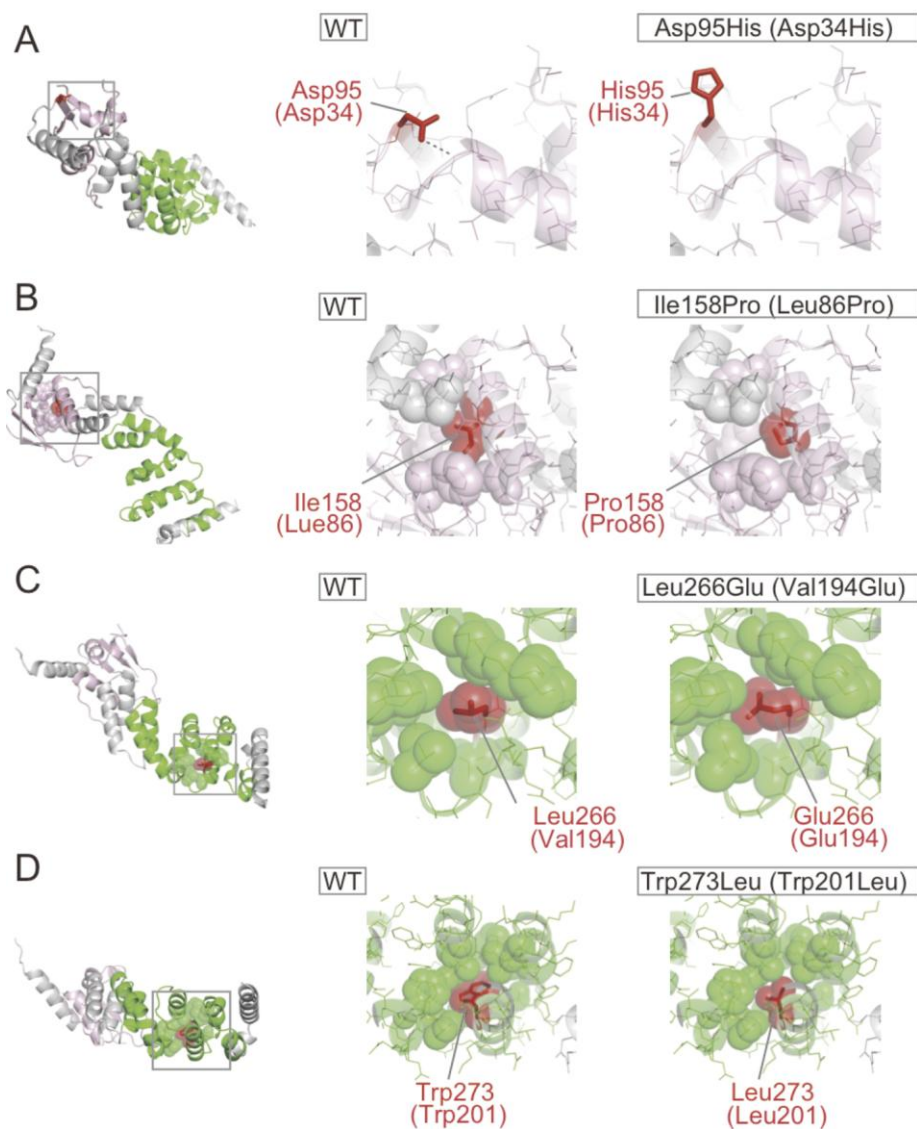

**Figure S5. Structural Modeling of the Missense KLHL40 Substitutions on BTB-BACK Domain Structures**

Impact of the p.Asp34His (A), p.Leu86Pro (B), p.Val194Lys (C) and p.Trp201Leu (D) substitutions on the BTB-BACK domain structures. Overall (left) and close-up views of the wild-type crystal structure (center) and its modeled mutant structures (right) of the BTB-BACK domain of human KLHL11 (PDB code 3I3N) are shown. Amino acid residues at the positions of 95, 158, 266 and 273 of human KLHL11, which correspond to those of 34, 86, 194 and 201 of human KLHL40, are shown as sticks with van der Waals spheres in red. Side chains of some residues forming the hydrophobic core around the substituted residues are shown in transparent van der Waals representation in (B)–(D).  $\alpha$ -helices and loops are drawn as opaque ribbons, arrows and threads in an overall view (left) and as transparent ones in close-up views (center and right). In close-up views, the stick model structure is also shown, and a hydrogen bond is depicted as a gray dotted line. Indicated residue numbers refer to human KLHL11 with those corresponding to human KLHL40 in parentheses. The substitutions were introduced *in silico* using FoldX. Colors are as in Figure 2.

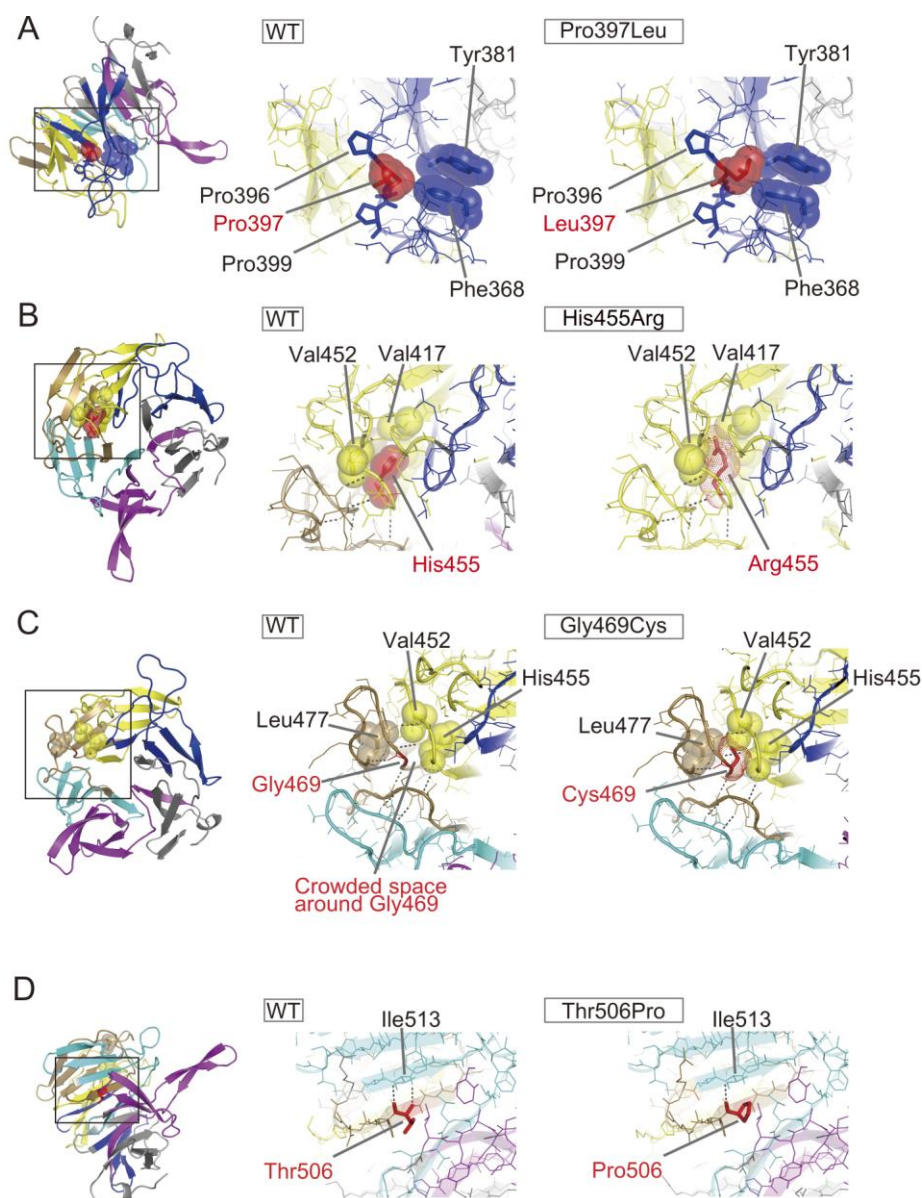

**Figure S6. Structural Modeling of the Missense KLHL40 Substitutions on the Kelch Domain Structure**

Impact of the p.Pro397Leu (A), p.His455Arg (B), p.Gly469Cys (C) and p.Thr506Pro (D) substitutions on the Kelch domain structure. Overall (left) and close-up views of the wild-type crystal structure (center) and its modeled mutant structures (right) of the Kelch domain of human KLHL40 are shown with indications of amino acid residues involved in interactions with the substituted residues, which are colored in red. The substituted residues and the surrounding residues involved in hydrophobic cores are shown as sticks with van der Waals transparent spheres or, in the case of the mutated Arg455 (B, right) and Cys469 (C, right) residues, van der Waals dots. In (A), the residues which form a type II polyproline helix are shown as sticks.  $\beta$ -sheets and loops are drawn as opaque arrows and threads in an overall view (left) and as transparent ones in close-up views (center and right). The stick model structure is also shown in close-up views. The substitutions were introduced *in silico* using FoldX. Colors are as in Figure 2.

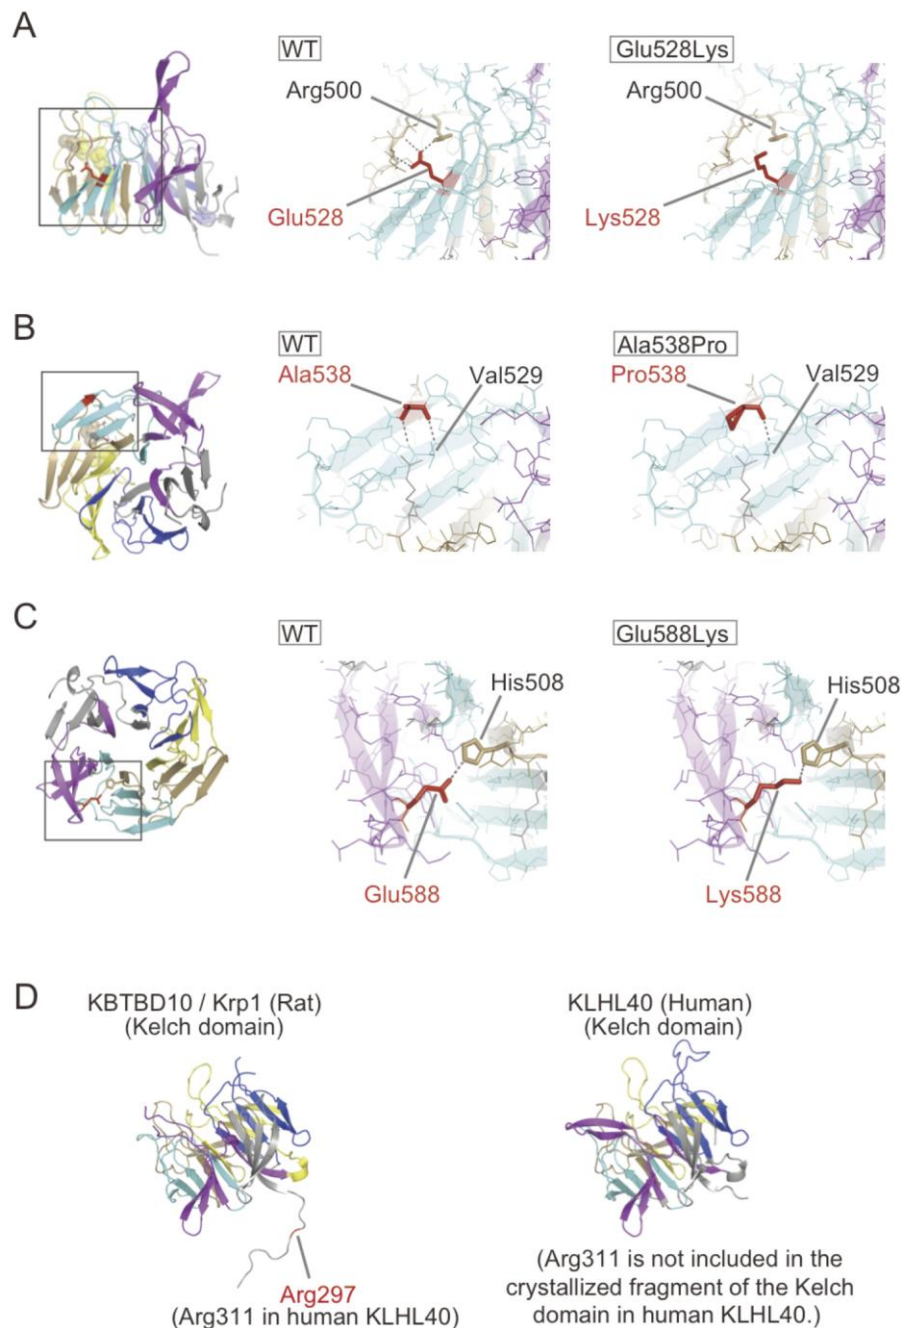

**Figure S7. Structural Modeling of the Missense KLHL40 Substitutions on the Kelch Domain Structure (Continued)**

(A–C) Impact of the p.Glu528Lys (A) and p.Ala538Pro (B) and p.Glu588Lys (C) substitutions on the Kelch domain structure. The substituted residues and their interacting residues are shown as sticks.  $\beta$ -sheets and loops are drawn as opaque arrows and threads in an overall view (left) and as transparent ones in close-up views (center and right). The stick model structure is also shown in close-up views. Hydrogen bonds are depicted as gray dotted lines. Colors are as in Figure 2.

(D) Location of Arg311 in KLHL40. Crystal structures of the Kelch domains of rat Kelch repeat and BTB (POZ) domain containing 10 (KBTBD10/Krp1; PDB code 2WOZ) and human KLHL40 (PDB code 4ASC) are shown with indication of the position of Arg297 in rat KBTBD10/Krp1 corresponding to Arg311 in human KLHL40.



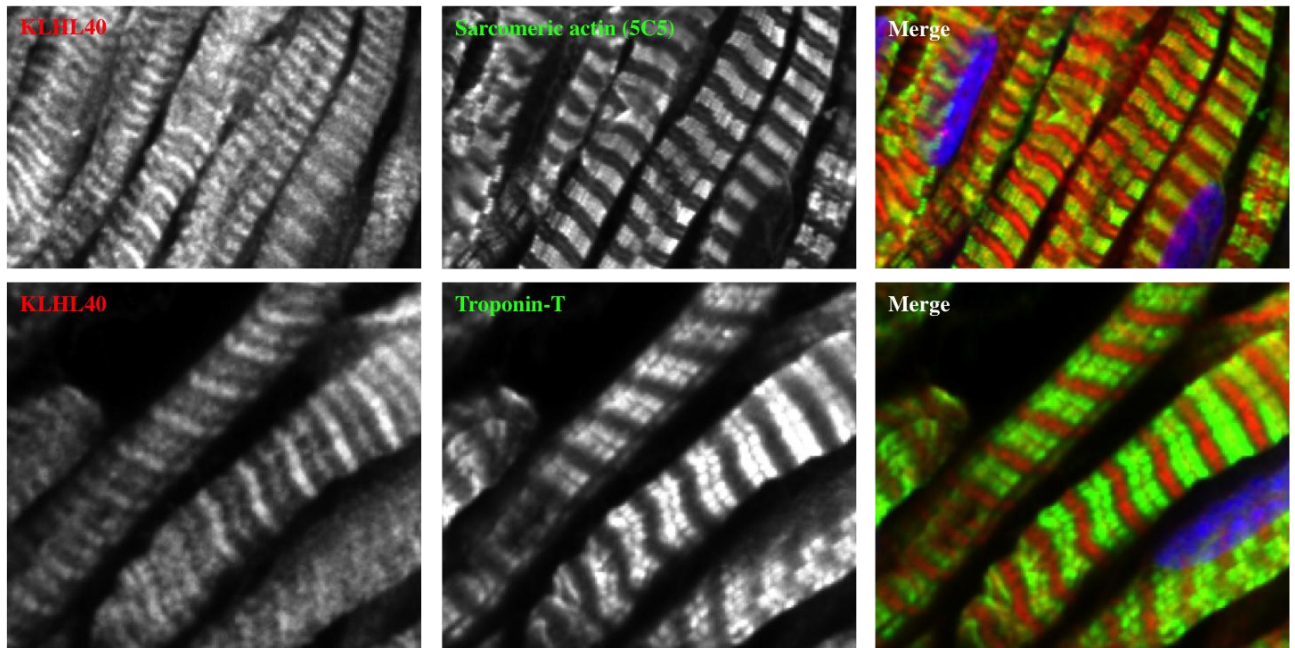

**Figure S8. Confocal Microscopy of Fetal Human Skeletal Muscle Costained for KLHL40 and Thin Filament Markers**

Sections of human fetal skeletal muscle (31 weeks gestation) were colabeled with the KLHL40 antibody and a monoclonal troponin-T antibody or a monoclonal antibody to sarcomeric  $\alpha$ -actin (clone 5C5).

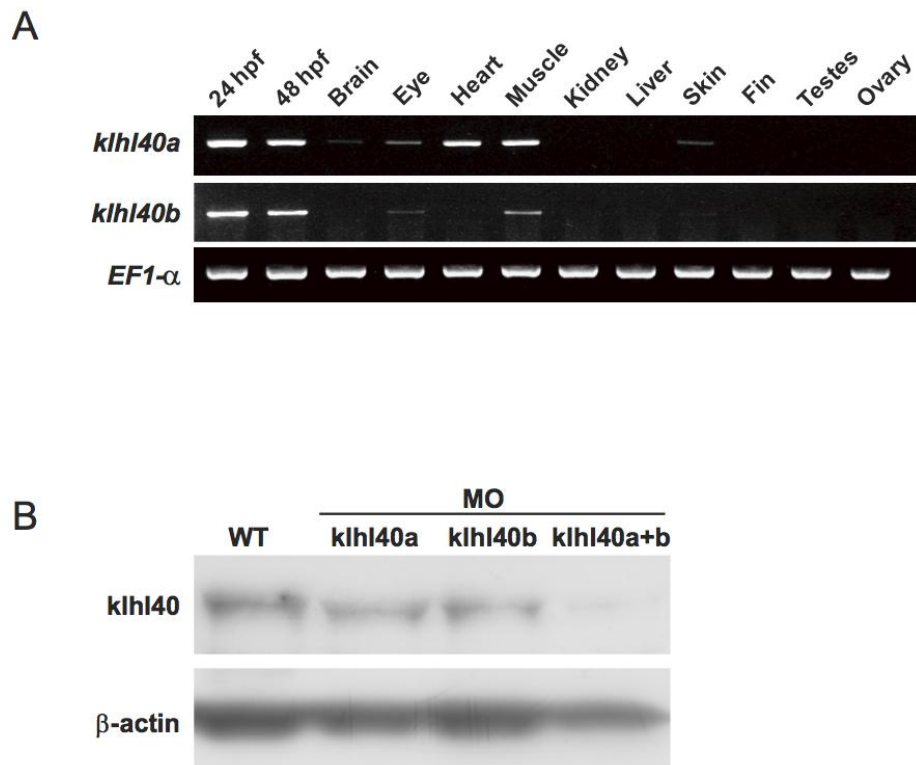

**Figure S9. *khl40* Expression in Zebrafish and Morpholino Knockdown**

(A) RT-PCR analysis demonstrating expression of both *khl40a* and *khl40b* in the zebrafish at 24 and 48 hours postfertilization (hpf). In adult tissues strong bands are observed for *khl40a* in the heart and skeletal muscle with faint bands detected in the brain, eye, and fin. Adult expression of *khl40b* is detected in the muscle, with faint bands in the eye and fin.

(B) Efficacy of the *khl40a*-MO and *khl40b*-MO was demonstrated by loss of Klhl40a and Klhl40b and both Klhl40a/40b in immunoblot analysis using an antibody raised against the C-terminal of KLHL40.  $\beta$ -actin was used as a loading control. Dechorionated embryos at 24 hpf were lysed, and immunoblotting was performed using antibodies against KLHL40 (KBTBD5; 1:1,000 dilution, ARP39889\_P050; Aviva Systems Biology) and  $\beta$ -actin (1:5,000 dilution, ab6276; Abcam). Positive signals were detected using an ECL kit.

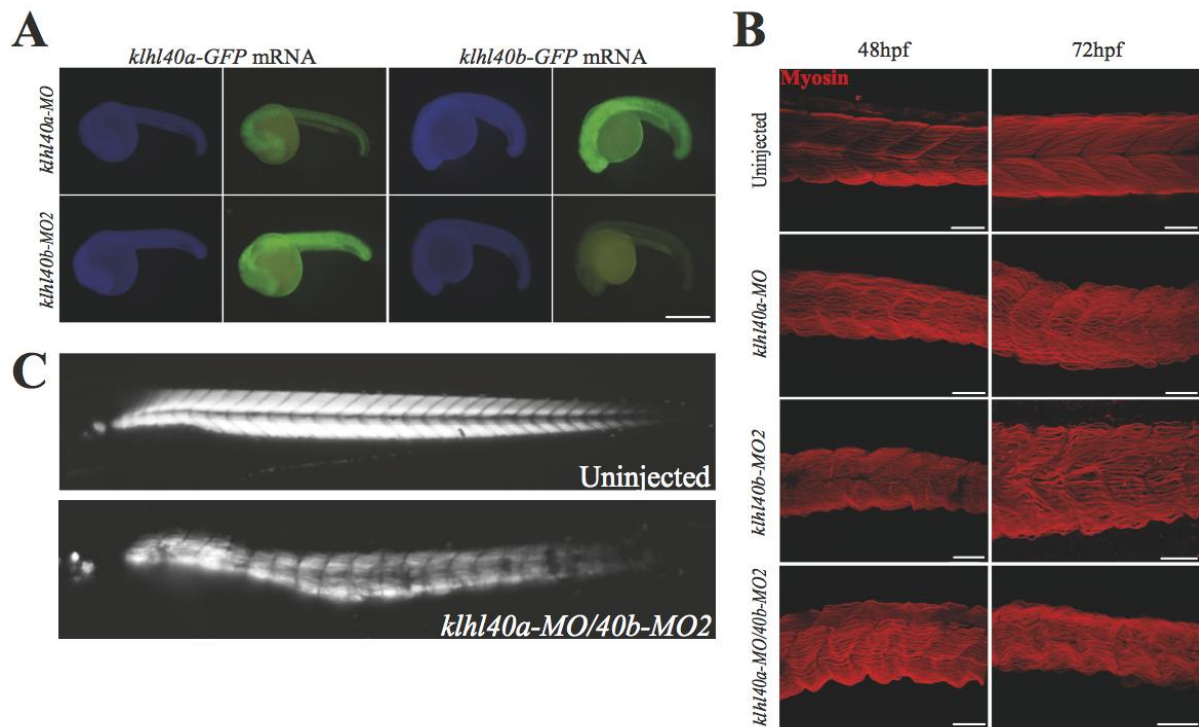

**Figure S10. *kllh40* Morpholino Knockdown and Double Knockdown**

(A) Green fluorescent protein (GFP) mRNA in which the initiation sequence had been replaced by the *kllh40a*-MO or *kllh40b*-MO2 target site was injected into embryos. Co-injection of *kllh40a*-MO or *kllh40b*-MO2 demonstrated the inhibition of GFP translation. Injection of *kllh40a*-MO into *kllh40b*-GFP mRNA injected embryos or injection of *kllh40b*-MO2 into *kllh40a*-GFP mRNA injected embryos showed no effect. Cascade blue was used as an injection control. Scale bar: 500  $\mu$ m. Efficacies of *kllh40a*-MO and *kllh40b*-MO2 were tested by co-injecting mRNA containing the MO target sequence fused with eGFP. eGFP reporter constructs were generated (Table S1) and amplified sequences were cloned into pCS2+ vector. mRNA was produced using the mMACHINE kit (Life Technologies), and injected at 12.5ng/ $\mu$ l.

(B) Knockdown of either Kllh40a or Kllh40b (*kllh40b*-MO2) results in severe disruption of the skeletal muscle with fibers appearing wavy and extensive gaps between fibers in contrast to the densely packed and aligned fibers of the uninjected controls. Embryos injected with both morpholinos show only a slight increase in severity. Maximum intensity projection images from confocal image series following immunolabeling with an antibody to myosin (clone A4.1025).

(C) *kllh40a*-MO/40b-MO2 double morphant fish at 72 hpf display a greatly altered birefringence pattern compared to uninjected controls, indicating wide-spread disruption of the sarcomeric register. Scale bar: 50  $\mu$ m.

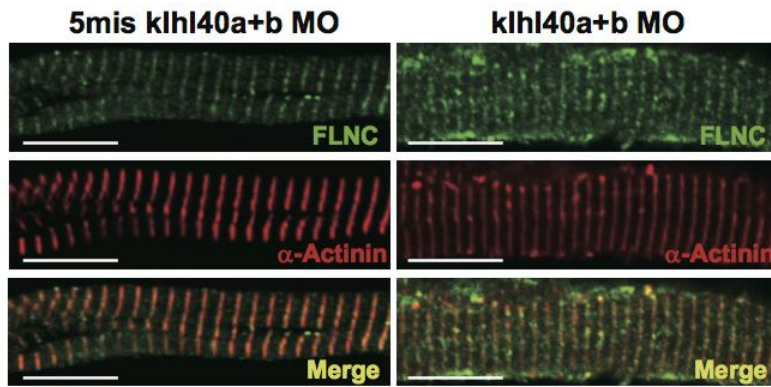

**Figure S11. Isolation of Myofibers from *klhl40a*-MO/*40b*-MO Double Morphants Showed an Aggregation of Z-Disk Proteins, Suggesting the Presence of Nemaline Bodies**

Confocal micrographs following immunolabeling with an antibody to FLNC (HPA006135) and  $\alpha$ -actinin in isolated myofibers from 5mis injected and *klhl40a*-MO/*40b*-MO injected embryos. Scale bar: 10  $\mu$ m.



**Table S1. Primer and Morpholino Sequences for Zebrafish Studies**

| <b>Primer Sequences for Amplification of Zebrafish <i>klhl40a</i> and <i>klhl40b</i> cDNA</b> |                                                                     |
|-----------------------------------------------------------------------------------------------|---------------------------------------------------------------------|
| <i>klhl40a</i> forward primer:                                                                | 5'-ATGGCCTCCATGTCAGTGGA-3'                                          |
| <i>klhl40a</i> reverse primer                                                                 | 5'-ATTCCATGGCCATAAACTGC-3'                                          |
| <i>klhl40b</i> forward primer                                                                 | 5'-CATCAGGCTACGTCTGGTTCCTCGG-3'                                     |
| <i>klhl40b</i> reverse primer                                                                 | 5'-CTCCATGGCCATACTAGGTAGG-3'                                        |
| <b>Primer Sequences for RT-PCR of Zebrafish <i>klhl40a</i> and <i>klhl40b</i></b>             |                                                                     |
| <i>klhl40a</i> forward primer                                                                 | 5'-CCACAAAGGATTGGTCTACGTGA-3'                                       |
| <i>klhl40a</i> reverse primer                                                                 | 5'-CGCCAACATTGTCATTAATGTGTAAGG-3'                                   |
| <i>klhl40b</i> forward primer                                                                 | 5'-TAGTGTATGGCCATGGAGTTGTG-3'                                       |
| <i>klhl40b</i> reverse primer                                                                 | 5'-AGATTTTGGTGCAGTGAATGATTGG-3'                                     |
| <b>Sequences for Antisense Morpholinos Zebrafish <i>klhl40a</i> and <i>klhl40b</i></b>        |                                                                     |
| <i>klhl40a-MO</i>                                                                             | 5'-GGTCCACTGACATGGAGGCCATCTT-3'                                     |
| <i>klhl40b-MO</i>                                                                             | 5'-AGAGCCATGCTGACTGTCTTCAATC-3'                                     |
| <i>klhl40b-MO2</i>                                                                            | 5'-GGTAGAGCCATGCTGACTGTCTTCA-3'                                     |
| <b>Primers for eGFP Reporter Constructs</b>                                                   |                                                                     |
| <i>klhl40a</i> forward primer                                                                 | 5'-<br>AAGATGGCCTCCATGTCAGTGGACCTTGTGAGCAAGGGCGA<br>GGAGCTGTTCAC-3' |
| <i>klhl40b</i> forward primer                                                                 | 5'-<br>TGAAGACAGTCAGCATGGCTCTACCTGTGAGCAAGGGCGAG<br>GAGCTGTTCAC-3'  |
| reverse primer ( <i>klhl40a</i><br>and <i>klhl40b</i> )                                       | 5'-TTACTTGTACAGCTCGTCCATGCCG-3'                                     |

**Table S2. Heterozygous *KLHL40* Variants of Uncertain Significance**

| Family    | Variant                          | PolyPhen 2.0                 | SIFT                | Mutation Taster            | Provean               | Incidence EVS; 1000 Genomes |
|-----------|----------------------------------|------------------------------|---------------------|----------------------------|-----------------------|-----------------------------|
| Family 1  | c.50C>G<br>(p.Thr17Arg)          | Probably Damaging<br>(0.997) | Tolerated<br>(0.33) | Disease Causing<br>(0.999) | Damaging<br>(-2.606)  | ND; ND                      |
| Family 35 | c.361G>A<br>(p.Val121Met)        | Possibly Damaging<br>(0.617) | Damaging<br>(0.01)  | Disease Causing<br>(0.999) | Tolerated<br>(-1.235) | ND; ND                      |
| Family 36 | c.362T>C<br>(p.Val121Ala)        | Benign<br>(0.003)            | Tolerated<br>(0.13) | Disease Causing<br>(0.999) | Tolerated<br>(-0.804) | ND; ND                      |
| Family 4  | c.521_523delCCG<br>(p.Ala174del) | NA                           | NA                  | Polymorphism<br>(0.883)    | Damaging<br>(-8.760)  | NA; ND                      |
| Family 33 | c.956T>C<br>(p.Leu319Pro)        | Probably Damaging<br>(1.000) | Damaging<br>(0)     | Disease Causing<br>(0.999) | Damaging<br>(-2.816)  | ND; ND                      |

This table shows the single heterozygous variants identified in five additional NEM families. The interpretation of these variants by various mutation prediction programs are shown as are the incidences of these variants within the NHLBI Exome Sequencing Project database (EVS) and the 1000genomes browser. NA: not available; ND: not detected.

**Table S3. Detailed Clinical Features of NEM Cases Found to Have *KLHL40* Mutations**

| Family | Cases                  | Nationality | Sex (M/F) | Age (age at death) | Family history | Prenatal period   |                            | Neonatal period |        |                              | Facial involvement |                   | Dysphagia | Muscle weakness | Contractures at birth | Fractures at birth                              | Others                                                                                                       |
|--------|------------------------|-------------|-----------|--------------------|----------------|-------------------|----------------------------|-----------------|--------|------------------------------|--------------------|-------------------|-----------|-----------------|-----------------------|-------------------------------------------------|--------------------------------------------------------------------------------------------------------------|
|        |                        |             |           |                    |                | Prenatal symptoms | Fetal akinesia/hypokinesia | Birth age       | BW     | Asphyxia/respiratory failure | Facial weakness    | Minor dysmorphism |           |                 |                       |                                                 |                                                                                                              |
| F2     | Helsinki No.120        | Italian     | M         | (2mo)              | +              | +                 | +                          | 36w             | 2735g  | ++                           | ++                 | NI                | ++        | +++             | +                     | +                                               |                                                                                                              |
| F3     | BOS1191                | Turkish     | M         | 6mo                | +              | +                 | +                          | 34w             | 2500g  | ++                           | ++                 | NI                | ++        | +++             | +                     | +                                               | Chest deformity, Microgenitalia, Intellectual disability, Heart defect                                       |
| F5     | Helsinki No. 253       | Israeli     | M         | (2yrs)             | +++            | +                 | +                          | 41w             | 3020g  | +                            | +                  | NI                | ++        | ++              | +                     | -                                               | Chest deformity, Hypertension                                                                                |
|        |                        |             | M         | (1.5 yrs)          |                |                   |                            | 32w             | 1200g  | +                            | +                  | NI                | ++        | ++              | NI                    | -                                               | Chest deformity, Hyperthyroidism                                                                             |
| F6     | II-2; Helsinki No. 18  | Turkish     | M         | 8yrs               | +++            | NI                | NI                         | NI              | NI     | NI                           | NI                 | NI                | NI        | NI              | NI                    | NI                                              |                                                                                                              |
| F7     | Helsinki No. 3793      | Norwegian   | M         | (9d)               | -              | +                 | +                          | 36w             | 1775 g | ++                           | +                  | +                 | ++        | +++             | +                     | -                                               |                                                                                                              |
| F9     | Helsinki No. 161       | Turkish     | M         | (3d)               | +++            | +                 | NI                         | 37w             | 2130g  | +                            | NI                 | NI                | NI        | +++             | +                     | NI                                              | Chest deformity                                                                                              |
| F10    | II-1                   | Chinese     | M         | (5d)               | -              | +                 | +                          | 36w             | NI     | ++                           | +                  | +                 | +         | +++             | -                     | -                                               | Chest deformity, Finger and/or foot deformities                                                              |
| F12    | J11                    | Japanese    | M         | 3yrs               | -              | +                 | +                          | 34w             | 2122g  | +                            | +                  | NI                | +         | ++              | +                     | +                                               | Chest deformity, Brain abnormality                                                                           |
| F13    | J10                    | Korean      | F         | 6mo                | -              | +                 | NI                         | 36w             | 2646g  | +                            | +                  | +                 | +         | +               | +                     | NI                                              | Brain abnormality                                                                                            |
| F14    | Helsinki No. 5423      | Turkish     | M         | (4 mo)             | +++            | -                 | -                          | 41w             | 3330g  | ++                           | +                  | NI                | ++        | +++             | +                     | -                                               | Finger and/or foot deformities                                                                               |
| F15    | J12                    | Japanese    | M         | 3mo                | -              | +                 | NI                         | 37w             | 2412g  | +                            | ++                 | +                 | +         | ++              | +                     | +                                               | Chest deformity, Microgenitalia                                                                              |
| F16    | II-3                   | Japanese    | F         | 1yr                | +              | +                 | +                          | 38w             | 2660g  | +                            | +                  | +                 | ++        | ++              | +                     | +                                               | Anemia                                                                                                       |
|        |                        |             | M         | (1yr)              |                |                   |                            | 38w             | 2500g  | +                            | +                  | +                 | ++        | ++              | +                     | -                                               |                                                                                                              |
| F17    | V-2                    | Turkish     | F         | (3.5mo)            | +++            | +                 | +                          | 34w             | 2590g  | ++                           | +                  | +                 | ++        | +++             | +                     | +                                               | Chest deformity, Finger and/or foot deformities, Cardiac insufficiency, Heart defect, Pulmonary hypertension |
|        | F                      |             | (20d)     | 37w                |                |                   |                            | 2580g           | ++     | +                            | +                  | ++                | +++       | +               | +                     | Chest deformity, Finger and/or foot deformities |                                                                                                              |
| F18    | II-2                   | Kurdish     | M         | (10mo)             | +++            | +                 | +                          | 39w             | 3380g  | +                            | +                  | +                 | ++        | +++             | +                     | -                                               | Chest deformity, Finger and/or foot deformities                                                              |
| F19    | Helsinki No. 195       | Kurdish     | M         | 11yrs              | +              | -                 | -                          |                 |        | ++                           | +                  | +                 | ++        | +               | -                     | -                                               | Chest deformity, Finger and/or foot deformities, Spine deformity, Improved markedly, walks with an aid.      |
| F20    | J1                     | Japanese    | F         | 1.5yrs             | NI             | NI                | NI                         | NI              | NI     | NI                           | NI                 | NI                | NI        | NI              | NI                    | NI                                              |                                                                                                              |
| F21    | J2                     | Japanese    | F         | 3mo                | NI             | NI                | NI                         | NI              | NI     | NI                           | NI                 | NI                | NI        | NI              | NI                    | NI                                              |                                                                                                              |
| F22    | J3                     | Japanese    | F         | 1mo                | -              | -                 | -                          | 37w             | 2400g  | +                            | +                  | NI                | +         | ++              | NI                    | NI                                              |                                                                                                              |
| F23    | J4                     | Japanese    | F         | 1mo                | NI             | +                 | NI                         | 40w             | 2846g  | +                            | +                  | +                 | +         | ++              | +                     | NI                                              |                                                                                                              |
| F24    | J5                     | Japanese    | M         | 3mo                | +              | +                 | NI                         | 41w             | 2410g  | +                            | ++                 | NI                | +         | +               | +                     | NI                                              | Chest deformity                                                                                              |
| F25    | J6                     | Japanese    | F         | 6mo                | -              | -                 | -                          | 39w             | 2505g  | +                            | +                  | NI                | +         | ++              | +                     | +                                               | Chest deformity                                                                                              |
| F26    | J7                     | Japanese    | M         | 8mo                | -              | +                 | NI                         | 38w             | 2640g  | +                            | NI                 | +                 | +         | +               | +                     | NI                                              | Finger and/or foot deformities, Microgenitalia, Spine deformity                                              |
| F27    | J8                     | Japanese    | F         | 10mo               | NI             | +                 | +                          | 38w             | 3300g  | +                            | NI                 | NI                | NI        | +               | +                     | NI                                              | Finger and/or foot deformities                                                                               |
| F28    | J9                     | Japanese    | M         | 11mo               | -              | -                 | -                          | 42w             | 2660g  | +                            | +                  | NI                | +         | ++              | +                     | NI                                              | Chest deformity, Spine deformity                                                                             |
| F29    | Helsinki No. 388       | Turkish     | M         | (15d)              | ++             | +                 | +                          | 34w             | 2030g  | ++                           | +                  | NI                | NI        | +++             | +                     | +                                               | Finger and/or foot deformities                                                                               |
| F30    | Helsinki No. 66 (5663) | Turkish     | F         | (1hr)              | +++            | +                 | NI                         | 40w             | NI     | +                            | NI                 | +                 | ++        | +++             | +                     | NI                                              | Pulmonary hypoplasia                                                                                         |
| F31    | II-2; BOS74            | Vietnamese  | F         | (30d)              | +              | +                 | +                          | 38w             | 2429g  | ++                           | ++                 | NI                | NI        | +++             | +                     | +                                               | Chest deformity, Brain abnormality                                                                           |
|        |                        |             | M         | NI                 |                |                   |                            | 35w             | 2515g  | ++                           | NI                 | +                 | NI        | +++             | +                     | NI                                              | Microgenitalia                                                                                               |
| F34    | Helsinki No. 254       | Turkish     | F         | 20yrs              | -              | +                 | +                          | NI              | 3200g  | -                            | NI                 | NI                | -         | +               | -                     | -                                               | Ambulant, Non-progressive, Motor milestones not delayed.                                                     |

Family History; +: positive affected sibs or spontaneous abortions, ++: positive consanguinity, +++: both positive affected sibs and consanguinity. Asphyxia/Respiratory Failure; +: present, ++: ventilator required. Facial Weakness; +: present, ++: with ophthalmoparesis. Dysphagia; +: present, ++: tube-feeding/gastrostomy required. Muscle Weakness; +: present, ++: severe, +++: no movement. NI: no information; -: not present.
